# Supplementary material for: CD4+ T cells are activated in regional lymph nodes and migrate to skin to initiate lymphedema
Source: PubMed Central journal article supplement (PMC5958132; doi:10.1038/s41467-018-04418-y), 2018-05-17
Supplement: 41467_2018_4418_MOESM2_ESM.pdf [file 41467_2018_4418_MOESM2_ESM.pdf]

## **Description of Additional Supplementary Files**

**Supplementary Movie 1. No impairment lymphatic vessel pumping despite lymphatic injury in CD4KO mice.** Near-infrared lymphangiography of collecting lymphatic vessel pumping following PLND in CD4KO mice.

**Supplementary Movie 2. Adoptively transferred CD4<sup>+</sup> T cells mediate impaired lymphatic vessel pumping.** Near-infrared lymphangiography of collecting lymphatic vessel pumping following PLND in AT mice.

**Supplementary Movie 3. Impaired lymphatic vessel pumping after lymphatic injury in WT mice.** Near-infrared lymphangiography of collecting lymphatic vessel pumping following PLND in WT mice.

**Supplementary Movie 4. iNOS mediates impaired lymphatic vessel pumping following lymphatic injury.** Near-infrared lymphangiography of collecting lymphatic vessel pumping following PLND in iNOS knockout (iNOS KO) mice.
